# Supplementary material for: Simulation-based model checking approach to cell fate specification during Caenorhabditis elegans vulval development by hybrid functional Petri net with extension
Source: PubMed Central journal article supplement (PMC2691733; doi:10.1186/1752-0509-3-42), 2009-04-27
Supplement: 1752-0509-3-42-S1.pdf [file 1752-0509-3-42-S1.pdf]

**Preliminary Notations:**

- (1) Let  $PN_e$  denote the whole VPC fate model shown in Figure 5. Let  $PN_{e_{sg}}$  be a single VPC fate model shown in Figure 6 whose six copies are embedded in  $PN_e$ .
- (2) Let  $threshold\_1$  be the criterion of  $PN_e$  for determining the 1° fate. Let  $threshold\_2$  be the criterion for determining the 2° fate.
- (3) The  $interval$  is a variable used for the comparison with  $interval\_1$  and  $interval\_2$ .
- (4) A time course from the time epoch  $\tau_i$  to  $\tau_{i+interval}$  is denoted as  $[\tau_i, \tau_{i+interval})$ .  $\tau_i$  is the first time epoch inducing such an over-threshold state whose length  $interval\_1$  is longer than or equal to the given  $interval$ ;  $\tau_j$  is the first time epoch inducing such an over-threshold state whose length  $interval\_2$  is longer than or equal to the given  $interval$ .
- (5) Let  $simulation\_time$  be a given simulation time period. □

**Rule I** is a biological fate determination rule to determine the final VPC fate of  $PN_{e_{sg}}$ , where

**In the case of  $lin-12wt$  or  $lin-12ko$  existing:**

$$\text{Cell fate} = \left\{ \begin{array}{l}
 1^\circ : ((m_{18}^{[\tau_i, \tau_{i+interval\_1}]} \geq threshold\_1) \wedge (m_{30}^{[\tau_j, \tau_{j+interval\_2}]} \geq threshold\_2) \wedge (m_{18}^{\tau_i} \leq m_{30}^{\tau_j}) \wedge \\
 (interval\_1 \geq interval) \wedge (interval\_2 \geq interval)) \vee ((m_{18}^{[\tau_i, \tau_{i+interval\_1}]} \geq threshold\_1) \\
 \wedge (m_{30}^{[\tau_j, \tau_{j+interval}]} \leq threshold\_2) \wedge (interval\_1 \geq interval)) \\
 \text{(if both the concentrations of } 1^\circ (m_{18}) \text{ and } 2^\circ (m_{30}) \text{ are not less than} \\
 \text{the threshold values (modeled to two entities: } threshold\_1 \text{ and } threshold\_2), \\
 \text{and the over-threshold states are maintained longer than or equal to a given} \\
 \text{time length (modeled as } interval), \text{ the corresponding cell fate will} \\
 \text{be adopted according to the time epoch that the threshold is firstly exceeded;} \\
 \text{or the concentration of } m_{30} \text{ has ever decreased below } threshold\_2 \\
 \text{during } [\tau_j, \tau_{j+interval}) \text{ while } m_{18} \text{ is kept over } threshold\_1 \text{ at} \\
 \text{all times during } [\tau_i, \tau_{i+interval\_1}), \text{ then the } 1^\circ \text{ fate will be adopted.)} \\
 \\
 2^\circ : ((m_{18}^{[\tau_i, \tau_{i+interval\_1}]} \geq threshold\_1) \wedge (m_{30}^{[\tau_j, \tau_{j+interval\_2}]} \geq threshold\_2) \wedge (m_{18}^{\tau_i} > m_{30}^{\tau_j}) \wedge \\
 (interval\_1 \geq interval) \wedge (interval\_2 \geq interval)) \vee \\
 ((m_{18}^{[\tau_i, \tau_{i+interval}]} \leq threshold\_1) \wedge (m_{30}^{[\tau_j, \tau_{j+interval\_2}]} \geq threshold\_2) \wedge \\
 (interval\_2 \geq interval)) \\
 \text{(if } m_{18} \text{ and } m_{30} \text{ exceed } threshold\_1 \text{ and } threshold\_2, \text{ respectively,} \\
 \text{each over-threshold state is maintained longer than or equal to the given} \\
 \text{interval, and the time epoch that } m_{30} \text{ exceeds } threshold\_2 \\
 \text{is earlier than the one of } m_{18}; \text{ or the concentration of} \\
 \text{ } m_{18} \text{ has ever decreased below } threshold\_1 \text{ during } [\tau_i, \tau_{i+interval}) \text{ while} \\
 \text{ } m_{30} \text{ is kept in an over-threshold state during } [\tau_j, \tau_{j+interval\_2}), \\
 \text{then the } 2^\circ \text{ fate will be adopted.)} \\
 \\
 3^\circ : \text{ otherwise;}
 \end{array} \right.$$

In the case of *lin-12gf* existing:

$$\text{Cell fate} = \left\{ \begin{array}{l} 1^\circ : ((m_{18}^{[\tau_i, \tau_i + interval_1]} \geq threshold_1) \wedge (m_{30}^{[\tau_j, \tau_j + interval_2]} \geq threshold_2) \wedge \\ (interval_1 \geq interval) \wedge (interval_2 \geq interval)) \vee \\ ((m_{18}^{[\tau_i, \tau_i + interval_1]} \geq threshold_1) \wedge (m_{30}^{[\tau_j, \tau_j + interval]} \leq threshold_2) \wedge \\ (interval_1 \geq interval)) \\ \\ \text{(if } m_{18} \text{ is greater than or equal to } threshold_1, \text{ and the} \\ \text{over-threshold state is maintained longer than or equal to} \\ \text{interval without respect to the time course expression of } 2^\circ, \\ \text{the } 1^\circ \text{ fate will be adopted.)} \\ \\ 2^\circ : (m_{18}^{[\tau_i, \tau_i + interval]} \leq threshold_1) \wedge (m_{30}^{[\tau_j, \tau_j + interval_2]} \geq threshold_2) \wedge \\ (interval_2 \geq interval) \\ \\ \text{(if } m_{30} \text{ exceed } threshold_2 \text{ and is kept in an over-threshold state all the times} \\ \text{during } [\tau_j, \tau_j + interval), \text{ and once the concentration of } 1^\circ \text{ is} \\ \text{less than } threshold_1 \text{ during } [\tau_i, \tau_i + interval), \text{ the } 2^\circ \text{ fate will be adopted.)} \\ \\ 3^\circ : \text{ otherwise;} \end{array} \right.$$

□

**Rule II** is another biological fate determination rule to determine the final VPC fate of  $PN_{e_{sg}}$ , where

In the case of *lin-12wt* or *lin-12ko* mutant existing:

$$\text{Cell fate} = \left\{ \begin{array}{l} 1^\circ : ((m_{18}^{\tau_i} \geq threshold_1) \wedge (m_{30}^{\tau_j} \geq threshold_2) \wedge (m_{18}^{\tau_i} \leq m_{30}^{\tau_j})) \\ \vee ((m_{18}^{\tau_i} \geq threshold_1) \wedge (m_{30}^{[\tau_j, simulation\_time]} < threshold_2)) \\ \\ \text{(Once } m_{18} \text{ firstly exceeds } threshold_1, \text{ the } 1^\circ \text{ fate will be} \\ \text{adopted no matter how } m_{30} \text{ changes.)} \\ \\ 2^\circ : ((m_{18}^{\tau_i} \geq threshold_1) \wedge (m_{30}^{\tau_j} \geq threshold_2) \wedge (m_{18}^{\tau_i} > m_{30}^{\tau_j})) \\ \vee ((m_{18}^{[\tau_j, simulation\_time]} < threshold_1) \wedge (m_{30}^{\tau_j} \geq threshold_2)) \\ \\ \text{(Once } m_{30} \text{ firstly exceeds } threshold_2, \text{ the } 2^\circ \text{ fate will be} \\ \text{adopted no matter how } m_{18} \text{ changes.)} \\ \\ 3^\circ : \text{ otherwise;} \end{array} \right.$$

In the case of *lin-12gf* existing:

$$\text{Cell fate} = \left\{ \begin{array}{l} 1^\circ : m_{18}^{\tau_i} \geq threshold_1 \\ \\ \text{(Once } m_{18} \text{ exceeds } threshold_1, \text{ the } 1^\circ \text{ fate will be adopted.)} \\ \\ 2^\circ : m_{18}^{[\tau_i, simulation\_time]} < threshold_1 \\ \\ \text{(if } m_{18} \text{ keeps a low concentration less than } threshold_1 \text{ until the end of} \\ \text{simulation\_time, the } 2^\circ \text{ fate will be adopted.)} \\ \\ 3^\circ : \text{ otherwise;} \end{array} \right.$$

□
